# Supplementary material for: The Integration of Artificial Intelligence in Orthodontic Diagnosis and Treatment Planning: A PRISMA-Guided Systematic Review
Source: Research Square preprint supplement (doi:10.21203/rs.3.rs-8108220/v1), 2025-12-16
Supplement: Supplementary file 1 [file 1002c727a0d739f65dfb5a50.docx]

PRISMA 2020 Checklist

This checklist is based on the PRISMA 2020 statement (Page et al., BMJ 2021;372:n71). It has been completed for the systematic review: “The Integration of Artificial Intelligence in Orthodontic Diagnosis and Treatment Planning: A Systematic Review.”

| Section | Checklist Item | Location in Manuscript | Reported |
| --- | --- | --- | --- |
| Title | Identify the report as a systematic review. | Title page | Yes |
| Abstract | See PRISMA 2020 for Abstracts checklist. | Structured abstract provided | Yes |
| Rationale | Describe rationale for the review. | Introduction, para 1 | Yes |
| Objectives | Provide explicit statement of objectives. | Introduction, final para | Yes |
| Eligibility criteria | Specify inclusion and exclusion criteria. | Methods, Eligibility criteria | Yes |
| Information sources | Specify databases and dates searched. | Methods, Information sources | Yes |
| Search strategy | Present full search strategies. | Methods, Search strategy | Yes |
| Selection process | State how studies were selected. | Methods, Study selection | Yes |
| Data collection process | Describe method of data extraction. | Methods, Data extraction | Yes |
| Data items | List and define all variables sought. | Methods, Data extraction | Yes |
| Risk of bias assessment | Describe methods for assessing risk of bias. | Methods, Quality assessment | Yes |
| Effect measures | Specify effect measures. | Results, Table 1/2 | Yes |
| Synthesis methods | Describe methods for synthesis. | Methods, Analysis | Yes |
| Results – Study selection | Numbers of studies screened, included (with flow diagram). | Results, PRISMA diagram | Yes |
| Results – Study characteristics | Present characteristics for each study. | Results, Table 1 | Yes |
| Results – Risk of bias | Present risk of bias assessments. | Results, Table 2 (QUADAS-2) | Yes |
| Results – Synthesis | Summarize results of syntheses. | Results, Discussion | Yes |
| Discussion | Discuss limitations of evidence and review process. | Discussion | Yes |
| Registration | Provide registration information (PROSPERO). | Methods, Protocol and Registration | CRD420251134644 |
| Support | Describe sources of support/funding. | Declarations | None |
| Competing interests | Declare competing interests. | Declarations | None declared |

Note: This checklist is provided as part of the submission to BMC Oral Health. It is adapted from the PRISMA 2020 statement.

Risk of bias was assessed using two complementary tools: the QUADAS-2 tool for diagnostic accuracy studies and the PROBAST tool for prediction-model studies. This ensured appropriate evaluation of both diagnostic and prognostic AI applications.
