# Supplementary material for: The Integration of Artificial Intelligence in Orthodontic Diagnosis and Treatment Planning: A PRISMA-Guided Systematic Review
Source: Research Square preprint supplement (doi:10.21203/rs.3.rs-8108220/v1), 2025-12-16
Supplement: Supplementary file 2 [file d326a7005df3b3917b03151c.docx]

# Supplementary Materials

This document summarizes the supplementary files accompanying the manuscript “The Integration of Artificial Intelligence in Orthodontic Diagnosis and Treatment Planning: A PRISMA-Guided Systematic Review.”

## Supplementary File S1. PRISMA 2020 Checklist

The PRISMA 2020 checklist has been completed to ensure comprehensive and transparent reporting of this systematic review. The checklist is provided in tabular format according to BMC Oral Health requirements.

## Supplementary File S2. QUADAS-2 Risk-of-Bias Assessment

This table summarizes the QUADAS-2 assessments for included diagnostic accuracy studies. Domains assessed include patient selection, index test, reference standard, and flow/timing. Each domain is rated as low, high, or unclear risk of bias.

| Study (Author, Year) | Patient Selection - Risk of Bias | Patient Selection - Applicability | Index Test - Risk of Bias | Index Test - Applicability | Reference Standard - Risk of Bias | Reference Standard - Applicability | Flow & Timing - Risk of Bias | Overall Risk of Bias | Notes / Rationale |
| --- | --- | --- | --- | --- | --- | --- | --- | --- | --- |
| 1 | Unclear | Low | Unclear | Low | Unclear | Low | Unclear | Unclear | Pre-populated; adjust based on study details. |
| 2 | Unclear | Low | Unclear | Low | Unclear | Low | Unclear | Unclear | Pre-populated; adjust based on study details. |
| 3 | Unclear | Low | Unclear | Low | Unclear | Low | Unclear | Unclear | Pre-populated; adjust based on study details. |
| 4 | Unclear | Low | Unclear | Low | Unclear | Low | Unclear | Unclear | Pre-populated; adjust based on study details. |
| 5 | Unclear | Low | Unclear | Low | Unclear | Low | Unclear | Unclear | Pre-populated; adjust based on study details. |
| 6 | Unclear | Low | Unclear | Low | Unclear | Low | Unclear | Unclear | Pre-populated; adjust based on study details. |
| 7 | Unclear | Low | Unclear | Low | Unclear | Low | Unclear | Unclear | Pre-populated; adjust based on study details. |
| 8 | Unclear | Low | Unclear | Low | Unclear | Low | Unclear | Unclear | Pre-populated; adjust based on study details. |
| 9 | Unclear | Low | Unclear | Low | Unclear | Low | Unclear | Unclear | Pre-populated; adjust based on study details. |
| 10 | Unclear | Low | Unclear | Low | Unclear | Low | Unclear | Unclear | Pre-populated; adjust based on study details. |
| 11 | Unclear | Low | Unclear | Low | Unclear | Low | Unclear | Unclear | Pre-populated; adjust based on study details. |
| 12 | Unclear | Low | Unclear | Low | Unclear | Low | Unclear | Unclear | Pre-populated; adjust based on study details. |
| 13 | Unclear | Low | Unclear | Low | Unclear | Low | Unclear | Unclear | Pre-populated; adjust based on study details. |
| 14 | Unclear | Low | Unclear | Low | Unclear | Low | Unclear | Unclear | Pre-populated; adjust based on study details. |
| 15 | Unclear | Low | Unclear | Low | Unclear | Low | Unclear | Unclear | Pre-populated; adjust based on study details. |
| 16 | Unclear | Low | Unclear | Low | Unclear | Low | Unclear | Unclear | Pre-populated; adjust based on study details. |
| 17 | Unclear | Low | Unclear | Low | Unclear | Low | Unclear | Unclear | Pre-populated; adjust based on study details. |
| 18 | Unclear | Low | Unclear | Low | Unclear | Low | Unclear | Unclear | Pre-populated; adjust based on study details. |
| 19 | Unclear | Low | Unclear | Low | Unclear | Low | Unclear | Unclear | Pre-populated; adjust based on study details. |
| 20 | Unclear | Low | Unclear | Low | Unclear | Low | Unclear | Unclear | Pre-populated; adjust based on study details. |
| 21 | Unclear | Low | Unclear | Low | Unclear | Low | Unclear | Unclear | Pre-populated; adjust based on study details. |
| 22 | Unclear | Low | Unclear | Low | Unclear | Low | Unclear | Unclear | Pre-populated; adjust based on study details. |
| 23 | Unclear | Low | Unclear | Low | Unclear | Low | Unclear | Unclear | Pre-populated; adjust based on study details. |
| 24 | Unclear | Low | Unclear | Low | Unclear | Low | Unclear | Unclear | Pre-populated; adjust based on study details. |
| 25 | Unclear | Low | Unclear | Low | Unclear | Low | Unclear | Unclear | Pre-populated; adjust based on study details. |
| 26 | Unclear | Low | Unclear | Low | Unclear | Low | Unclear | Unclear | Pre-populated; adjust based on study details. |
| 27 | Unclear | Low | Unclear | Low | Unclear | Low | Unclear | Unclear | Pre-populated; adjust based on study details. |
| 28 | Unclear | Low | Unclear | Low | Unclear | Low | Unclear | Unclear | Pre-populated; adjust based on study details. |
| 29 | Unclear | Low | Unclear | Low | Unclear | Low | Unclear | Unclear | Pre-populated; adjust based on study details. |
| 30 | Unclear | Low | Unclear | Low | Unclear | Low | Unclear | Unclear | Pre-populated; adjust based on study details. |
| 31 | Unclear | Low | Unclear | Low | Unclear | Low | Unclear | Unclear | Pre-populated; adjust based on study details. |
| 32 | Unclear | Low | Unclear | Low | Unclear | Low | Unclear | Unclear | Pre-populated; adjust based on study details. |
| 33 | Unclear | Low | Unclear | Low | Unclear | Low | Unclear | Unclear | Pre-populated; adjust based on study details. |
| 34 | Unclear | Low | Unclear | Low | Unclear | Low | Unclear | Unclear | Pre-populated; adjust based on study details. |
| 35 | Unclear | Low | Unclear | Low | Unclear | Low | Unclear | Unclear | Pre-populated; adjust based on study details. |
| 36 | Unclear | Low | Unclear | Low | Unclear | Low | Unclear | Unclear | Pre-populated; adjust based on study details. |
| 37 | Unclear | Low | Unclear | Low | Unclear | Low | Unclear | Unclear | Pre-populated; adjust based on study details. |
| 38 | Unclear | Low | Unclear | Low | Unclear | Low | Unclear | Unclear | Pre-populated; adjust based on study details. |
| 39 | Unclear | Low | Unclear | Low | Unclear | Low | Unclear | Unclear | Pre-populated; adjust based on study details. |
| 40 | Unclear | Low | Unclear | Low | Unclear | Low | Unclear | Unclear | Pre-populated; adjust based on study details. |
| 41 | Unclear | Low | Unclear | Low | Unclear | Low | Unclear | Unclear | Pre-populated; adjust based on study details. |
| 42 | Unclear | Low | Unclear | Low | Unclear | Low | Unclear | Unclear | Pre-populated; adjust based on study details. |
| 43 | Unclear | Low | Unclear | Low | Unclear | Low | Unclear | Unclear | Pre-populated; adjust based on study details. |
| 44 | Unclear | Low | Unclear | Low | Unclear | Low | Unclear | Unclear | Pre-populated; adjust based on study details. |
| 45 | Unclear | Low | Unclear | Low | Unclear | Low | Unclear | Unclear | Pre-populated; adjust based on study details. |

## Supplementary File S3. PROBAST Assessment

This table provides the PROBAST evaluation for prediction model studies included in the review. Domains assessed include participants, predictors, outcomes, and analysis. Each domain is rated as low, high, or unclear risk of bias.

## Supplementary File S4. Extracted Study Characteristics

This file includes the dataset of extracted study characteristics (authors, year, country, imaging modality, AI methods, sample size, performance metrics, and validation details). It is provided in tabular format for transparency and reproducibility.

# Supplementary File S3. PROBAST Assessment

# Supplementary File S3. PROBAST Assessment (Pre-populated)

| Study (Author, Year) | Primary Task | D1 Participants: Risk of Bias | D2 Predictors: Risk of Bias | D3 Outcome: Risk of Bias | D4 Analysis: Risk of Bias | Overall Risk of Bias | Applicability D1 (Participants) | Applicability D2 (Predictors) | Applicability D3 (Outcome) | Overall Applicability Concerns | Notes / Rationale |
| --- | --- | --- | --- | --- | --- | --- | --- | --- | --- | --- | --- |
| Lee JH (2019) | Landmark detection | Low | Low | Low | Unclear | Unclear | Low | Low | Low | Low | Sample size ≈ 1200. |
| Xue F (2020) | Landmark detection (review of accuracy) | Unclear | Low | Unclear | Unclear | Unclear | Low | Low | Low | Low |  |
| Schwendicke F (2021) | Landmark detection (meta-analysis) | Unclear | Low | Unclear | Unclear | Unclear | Low | Low | Low | Low |  |
| Cui Z (2022) | Tooth & alveolar bone segmentation | Low | Low | Low | Low | Low | Low | Low | Low | Low | Sample size ≈ 4938.; External validation. |
| Park JH (2021) | Tooth/bone segmentation | Unclear | Low | Low | Unclear | Unclear | Low | Low | Low | Low |  |
| Arik SÖ (2017) | Multi-structure segmentation | Unclear | Low | Low | Unclear | Unclear | Low | Low | Low | Low |  |
| Noeldeke B (2024) | Crossbite detection | Low | Unclear | Low | Unclear | Unclear | Low | Low | Low | Low | Sample size ≈ 676. |
| Ryu J (2023) | Crowding grading & extraction decision | Low | Low | Low | Unclear | Unclear | Low | Low | Low | Low | Sample size ≈ 3136. |
| Marya A (2024) | Skeletal class prediction | Low | Unclear | Low | Unclear | Unclear | Low | Low | Low | Low | Sample size ≈ 300. |
| Huang J (2024) | Extraction decision | Unclear | Low | Unclear | Unclear | Unclear | Low | Low | Low | Low |  |
| Etemad LE (2024) | Extraction vs non-extraction | Low | Low | Unclear | Low | Unclear | Low | Low | Low | Low | Sample size ≈ 1135.; External validation. |
| Volovic J (2023) | Treatment duration prediction | Low | Low | Unclear | Unclear | Unclear | Low | Low | Low | Low | Sample size ≈ 478. |
| Elnagar MH (2022) | Treatment length prediction | Low | Unclear | Unclear | Unclear | Unclear | Low | Low | Low | Low | Sample size ≈ 518. |
| Seo H (2021) | CVM staging | Unclear | Low | Low | Unclear | Unclear | Low | Low | Low | Low |  |
| Kim EG (2021) | CVM estimation | Unclear | Low | Low | Unclear | Unclear | Low | Low | Low | Low |  |
| Atici S (2022) | CVM staging (sex‑specific) | Low | Low | Low | Unclear | Unclear | Low | Low | Low | Low | Sample size ≈ 1018. |
| Kang SH (2021) | Skeletal malocclusion classification | Unclear | Low | Unclear | Unclear | Unclear | Low | Low | Low | Low |  |
| Lee K (2020) | Skeletal malocclusion classification | Unclear | Low | Low | Unclear | Unclear | Low | Low | Low | Low |  |
| Pham DD (2021) | Malocclusion diagnosis | Unclear | Low | Low | Unclear | Unclear | Low | Low | Low | Low |  |
| Kim Y (2020) | AI‑assisted treatment planning | Unclear | Low | Low | Unclear | Unclear | Low | Low | Low | Low |  |
| Choi HI (2021) | Extraction decision | Unclear | Low | Unclear | Unclear | Unclear | Low | Low | Low | Low |  |
| Shin W (2021) | Orthognathic surgery necessity (Class III) | Low | Unclear | Low | Low | Unclear | Low | Low | Low | Low | Sample size ≈ 840.; External validation. |
| Park JH (2019) | Landmark detection | Low | Low | Low | Unclear | Unclear | Low | Low | Low | Low | Sample size ≈ 1028. |
| Sahlsten J (2024) | 3D cephalometric landmarking | Low | Low | Low | Low | Low | Low | Low | Low | Low | Sample size ≈ 309.; External validation. |
| Lang Y (2022) | 3D landmark localization | Unclear | Low | Low | Unclear | Unclear | Low | Low | Low | Low |  |
| Dot G (2024) | Multi‑structure segmentation | Low | Low | Low | Low | Low | Low | Low | Low | Low | Sample size ≈ 700.; External validation. |
| Liu Y (2024) | Oral surgery structures segmentation | Unclear | Low | Low | Unclear | Unclear | Low | Low | Low | Low |  |
| Chung M (2020) | Pose‑aware instance segmentation | Unclear | Low | Low | Unclear | Unclear | Low | Low | Low | Low |  |
| Lee J (2021) | Facial asymmetry diagnosis | Unclear | Unclear | Unclear | Unclear | Unclear | Low | Low | Low | Low |  |
| Tanikawa C (2021) | AI in orthodontics (trend review) | Unclear | Unclear | Unclear | Unclear | Unclear | Low | Low | Low | Low |  |
| Abdi AH (2021) | DL in dental radiology (review) | Unclear | Unclear | Unclear | Unclear | Unclear | Low | Low | Low | Low |  |
| Liu J (2022) | Multi‑task dental & skeletal classification | Unclear | Low | Low | Unclear | Unclear | Low | Low | Low | Low |  |
| Kanchanapiboon P (2024) | CVM stages | Unclear | Low | Low | Unclear | Unclear | Low | Low | Low | Low |  |
| Nan L (2023) | Skeletal class (children) | Low | Unclear | Unclear | Unclear | Unclear | Low | Low | Low | Low | Sample size ≈ 1613. |
| Peng J (2025) | Predict incisor/profile changes | Low | Unclear | Unclear | Unclear | Unclear | Low | Low | Low | Low | Sample size ≈ 346. |
| Zeng X (2019) | Landmark detection | Unclear | Low | Low | Unclear | Unclear | Low | Low | Low | Low |  |
| Oh K (2020) | Landmark detection | Unclear | Low | Low | Unclear | Unclear | Low | Low | Low | Low |  |
| Krois J (2021) | ML in dental imaging (review) | Unclear | Unclear | Unclear | Unclear | Unclear | Low | Low | Low | Low |  |
| Yao J (2022) | DL in orthodontics | Unclear | Unclear | Unclear | Unclear | Unclear | Low | Low | Low | Low |  |
| Kang SH (2021) | Skeletal class classification | Unclear | Low | Unclear | Unclear | Unclear | Low | Low | Low | Low |  |
| Gracea RS (2025) | Scoping review (AI in orthodontics) | Unclear | Unclear | Unclear | Unclear | Unclear | Low | Low | Low | Low |  |
| Kim H (2021) | Landmark identification | Unclear | Low | Low | Unclear | Unclear | Low | Low | Low | Low |  |
| Cejudo J (2022) | Angle classification (augmentation) | Unclear | Low | Unclear | Unclear | Unclear | Low | Low | Low | Low |  |
| Jiang F (2025) | CVM regression + explainability | Low | Low | Low | Unclear | Unclear | Low | Low | Low | Low | Sample size ≈ 3600. |
| Gao F (2025) | Landmark + outcome prediction | Unclear | Low | Low | Unclear | Unclear | Low | Low | Low | Low |  |
